# Supplementary material
Source: publisher site journal article supplement (https://www.dovepress.com/get_supplementary_file.php?f=376103.docx)
Supplement: Supplementary file 1 [file get_supplementary_file.php]

**Supplementary materials**

This supplementary information provides additional data and statistical analyses. This was done for an alternate categorization of the four variables of interest. We produced descriptive statistics to summarize the frequency. A cross-tabulation analysis was also performed to examine the differentials of respondents’ socio-demographic characteristics and other independent variables with outcome of variables using Fisher’s exact, Pearson’s Chi-Square test, depending on the type of data. Ordinal logistic regression was used to obtain the adjusted correlation with the significance level set at p < 0.05 between vaccine acceptance, confidence, and hesitancy in general, and COVID-19 vaccination refusal and independent variables, with adjustment for potential confounders. Principal component analysis (ACP) was used to select variables in the logistic regression model.

**Table S1 Frequency of vaccine acceptance, confidence, hesitancy, in general, and COVID-19 vaccine refusal rate among respondents in the province of Quebec, Canada, 2020**

| **Variable** | **Number (%)** |
| --- | --- |
| **Vaccine acceptance** |  |
| I accept most or all of the vaccines | 952 (59.84) |
| I accept some of vaccines | 462 (29.04) |
| I refuse most or all of the vaccines recommended to me | 177 (11.13) |
| **Vaccine confidence** |  |
| N | 1,591 |
| Mean | 4.08 |
| Standard deviation | 1.39 |
| Range | (0-5) |
| 0-1 | 139 (8.74) |
| 2-3 | 199 (12.51) |
| 4-5 | 1,253 (78.76) |
| **Vaccine hesitancy** |  |
| N | 1589 |
| Mean | 11.61 |
| Standard deviation | 6.59 |
| Range | (0-32) |
| 0-10 | 737 (46.38) |
| 11-21 | 730 (45.94) |
| 22-32 | 122 (7.68) |
| **Vaccine refusal** |  |
| N | 1,599 |
| Mean | 3.20 |
| Standard deviation | 3.71 |
| Range | (0-12) |
| 0 | 603 (37.71) |
| 1-6 | 705 (44.09) |
| 7-11 | 172 (10.76) |
| 12 | 119 (7.44) |

**Table S2**  **Univariate analysis of factors associated with vaccine acceptance in the province of Quebec, Canada, 2020**

| **Variable** | **Vaccine acceptance** | | | | |
| --- | --- | --- | --- | --- | --- |
| I accept most or all of vaccines | I accept some of vaccines | I refuse most or all of vaccines | Total | -valuea |
| **N** | 952 | 462 | 177 | 1,591 |  |
|  | 59.84% | 29.04% | 11.13% | 100.00% |  |
| **Gender** |  |  |  |  |  |
| Male | 52.52% | 42.86% | 41.81% | 48.52% | 0.001 |
| Female | 47.37% | 57.14% | 58.19% | 51.41% |  |
| Intersex | 0.11% | 0.00% | 0.00% | 0.06% |  |
| **Age** |  |  |  |  |  |
| N | 952 | 462 | 177 | 1,591 |  |
| Mean | 51.33 | 48.03 | 49.55 | 50.17 | 0.001 |
| Standard deviation | 16.36 | 15.32 | 16.40 | 16.13 | 0.249 |
| Range | (18-92) | (18-84) | (18-80) | (18-92) |  |
| **Age (in years)** |  |  |  |  |  |
| 18-39 | 28.68% | 34.85% | 32.20% | 30.86% | 0.001 |
| 40-59 | 31.51% | 36.80% | 33.90% | 33.31% |  |
| 60 | 39.81% | 28.35% | 33.90% | 35.83% |  |
| **Education** |  |  |  |  |  |
| Secondary or less and Diploma of professional studies | 31.41% | 38.53% | 50.85% | 35.64% | <.001 |
| College and CEGEP | 28.89% | 28.79% | 27.68% | 28.72% |  |
| Baccalaureate, Master and PhD | 39.71% | 32.68% | 21.47% | 35.64% |  |
| **Income (CAD)** |  |  |  |  |  |
| N | 952 | 462 | 177 | 1,591 |  |
| Mean | 70,607 | 64,470 | 52,599 | 66,821 | <.001 |
| Standard deviation | 42,475 | 39,727 | 37,740 | 41,558 | 0.063 |
| Range | (2,500-165,000) | (2,500-165,000) | (2,500-165,000) | (2,500-165,000) |  |
| <$50,000 | 63.8% | 48.1% | 42.6% | 46.6% | <.001 |
| $50,000-$89,999 | 18.1% | 24.7% | 24.7% | 23.9% |  |
| ≥$90,000 | 18.1% | 27.3% | 32.7% | 29.5% |  |
| **Marital status** |  |  |  |  |  |
| Single | 26.16% | 29.22% | 42.37% | 28.85% | 0.003 |
| Married/living with a partner | 61.76% | 58.23% | 46.33% | 59.02% |  |
| Divorced/separated | 9.14% | 9.52% | 9.04% | 9.24% |  |
| Widowed | 2.94% | 3.03% | 2.26% | 2.89% |  |
| **Occupation** |  |  |  |  |  |
| Employed | 48.95% | 57.58% | 47.46% | 51.29% | <.001 |
| Retired | 36.24% | 24.24% | 30.51% | 32.12% |  |
| At home | 3.78% | 5.84% | 8.47% | 4.90% |  |
| Student | 3.99% | 4.11% | 2.82% | 3.90% |  |
| Unemployed | 3.68% | 5.84% | 7.91% | 4.78% |  |
| Sick and parental leave | 3.36% | 2.38% | 2.82% | 3.02% |  |
| **Residence** |  |  |  |  |  |
| Rural | 29.31% | 31.17% | 34.46% | 30.42% | 0.359 |
| Urban | 70.69% | 68.83% | 65.54% | 69.58% |  |
| **Housing status** |  |  |  |  |  |
| Owner | 65.86% | 58.01% | 57.63% | 62.66% | 0.006 |
| Tenant | 34.14% | 41.99% | 42.37% | 37.34% |  |
| **Greater Montreal area** |  |  |  |  |  |
| Outside of Greater Montreal | 57.67% | 51.30% | 55.93% | 55.63% | 0.077 |
| Greater Montreal | 42.33% | 48.70% | 44.07% | 44.37% |  |
| **Country of parents** |  |  |  |  |  |
| Canada | 89.50% | 81.60% | 87.57% | 86.99% | <.001 |
| France | 3.36% | 2.60% | 3.95% | 3.21% |  |
| Algeria | 0.42% | 1.08% | 0.56% | 0.63% |  |
| Other | 6.72% | 14.72% | 7.91% | 9.18% |  |
| **Country born** |  |  |  |  |  |
| Canada | 91.81% | 87.88% | 89.83% | 90.45% | 0.069 |
| France | 2.94% | 2.38% | 3.95% | 2.89% |  |
| Algeria | 0.42% | 0.87% | 0.56% | 0.57% |  |
| Other | 4.83% | 8.87% | 5.65% | 6.10% |  |
| **Residence status** |  |  |  |  |  |
| Temporary residence | 0.84% | 1.73% | 2.26% | 1.26% | 0.179 |
| Permanent residence | 2.31% | 2.16% | 0.56% | 2.07% |  |
| Canadian citizen | 96.85% | 96.10% | 97.18% | 96.67% |  |
| **Health care worker** |  |  |  |  |  |
| Yes | 16.15% | 16.47% | 10.26% | 15.67% | 0.381 |
| No | 83.85% | 83.53% | 89.74% | 84.33% |  |
| **Other essential worker** |  |  |  |  |  |
| Yes | 47.79% | 47.06% | 55.13% | 48.28% | 0.436 |
| No | 52.21% | 52.94% | 44.87% | 51.72% |  |
| **Non-essential worker** |  |  |  |  |  |
| Yes | 36.06% | 36.47% | 34.62% | 36.05% | 0.956 |
| No | 63.94% | 63.53% | 65.38% | 63.95% |  |
| **Caretaker** |  |  |  |  |  |
| Current | 5.67% | 8.66% | 10.17% | 7.04% | 0.119 |
| Former | 11.24% | 11.47% | 10.73% | 11.25% |  |
| Never | 83.09% | 79.87% | 79.10% | 81.71% |  |
| **Smoking** |  |  |  |  |  |
| Yes | 15.65% | 22.08% | 27.12% | 18.79% | <.001 |
| No | 84.35% | 77.92% | 72.88% | 81.21% |  |
| **Ever faced Acute disease (yourself)** |  |  |  |  |  |
| Yes | 24.05% | 20.56% | 21.47% | 22.75% | 0.310 |
| No | 75.95% | 79.44% | 78.53% | 77.25% |  |
| **Ever faced acute disease (relative)** |  |  |  |  |  |
| Yes | 15.44% | 14.29% | 10.73% | 14.58% | 0.259 |
| No | 84.56% | 85.71% | 89.27% | 85.42% |  |
| **Ever faced acute disease (family)** |  |  |  |  |  |
| Yes | 48.11% | 45.24% | 41.24% | 46.51% | 0.197 |
| No | 51.89% | 54.76% | 58.76% | 53.49% |  |
| **COVID-19 yourself** |  |  |  |  |  |
| Yes | 1.89% | 1.95% | 1.13% | 1.82% | 0.923 |
| No | 98.11% | 98.05% | 98.87% | 98.18% |  |
| **COVID-19 family** |  |  |  |  |  |
| Yes | 4.31% | 3.68% | 3.95% | 4.09% | 0.852 |
| No | 95.69% | 96.32% | 96.05% | 95.91% |  |
| **COVID-19 relative** |  |  |  |  |  |
| Yes | 10.92% | 11.26% | 8.47% | 10.75% | 0.575 |
| No | 89.08% | 88.74% | 91.53% | 89.25% |  |
| **Financial loss** |  |  |  |  |  |
| No loss | 52.42% | 43.94% | 49.72% | 49.65% | 0.005 |
| Slightly important loss | 33.40% | 39.83% | 33.33% | 35.26% |  |
| Fairly important loss | 12.61% | 13.42% | 11.30% | 12.70% |  |
| Very important loss | 1.58% | 2.81% | 5.65% | 2.39% |  |
| **Sense of Coherence-3**b |  |  |  |  |  |
| N | 952 | 462 | 177 | 1,591 |  |
| Mean | 4.06 | 3.77 | 3.76 | 3.94 | <.001 |
| Standard deviation | 1.31 | 1.31 | 1.35 | 1.32 | 0.865 |
| Range | (0-6) | (0-6) | (0-6) | (0-6) |  |
| 0-4 | 61.45% | 69.70% | 70.06% | 64.80% | 0.003 |
| 5-6 | 38.55% | 30.30% | 29.94% | 35.20% |  |
| **Risk** |  |  |  |  |  |
| N | 937 | 453 | 172 | 1,562 |  |
| Mean | 4.59 | 4.84 | 4.89 | 4.70 | 0.111 |
| Standard deviation | 2.44 | 2.40 | 2.53 | 2.44 | 0.684 |
| Range | (0-10) | (0-10) | (0-10) | (0-10) |  |
| 0 | 4.38% | 3.97% | 5.23% | 4.35% | 0.150 |
| 1-5 | 59.98% | 55.41% | 52.91% | 57.87% |  |
| 6-9 | 34.04% | 39.07% | 37.79% | 35.92% |  |
| 10 | 1.60% | 1.55% | 4.07% | 1.86% |  |
| **Fear of COVID-19 Scale**c |  |  |  |  |  |
| N | 952 | 462 | 177 | 1,591 |  |
| Mean | 16.89 | 16.55 | 13.94 | 16.46 | <.001 |
| Standard deviation | 6.28 | 5.92 | 6.15 | 6.23 | 0.351 |
| Range | (7-35) | (7-35) | (7-33) | (7-35) |  |
| **CORE-6D**d |  |  |  |  |  |
| N | 949 | 461 | 177 | 1,587 |  |
| Mean | 0.766 | 0.730 | 0.753 | 0.754 | <.001 |
| Standard deviation | 0.144 | 0.161 | 0.149 | 0.150 | 0.017 |
| Range | (0.100-0.950) | (0.100-0.950) | (0.160-0.950) | (0.100-0.950) |  |
| **SF-6Dv2**e |  |  |  |  |  |
| N | 952 | 462 | 177 | 1,591 |  |
| Mean | 0.742 | 0.693 | 0.718 | 0.725 | 0.003 |
| Standard deviation | 0.25 | 0.267 | 0.276 | 0.259 | 0.088 |
| Range | (-0.452-1) | (-0.389-1) | (-0.439-1) | (-0.452-1) |  |
| **EQ-5D-5L**f |  |  |  |  |  |
| N | 950 | 462 | 177 | 1,589 |  |
| Mean | 0.851 | 0.835 | 0.838 | 0.845 | 0.101 |
| Standard deviation | 0.132 | 0.142 | 0.153 | 0.138 | 0.016 |
| Range | (0.000-0.949) | (0.045-0.949) | (0.138-0.949) | (0.000-0.949) |  |

aThe -values refer to tests between classes using one-way analysis of variance, Bartlett’s test for equality of variances, Fisher's exact test, and Chi-square test of independence.

b3-item Sense-of-Coherence questionnaire with 3-point Likert scale "No", "Yes, sometimes" and "Yes, usually" encoded 0, 1 and 2 for questions 1 and 2 and encoded 2, 1 and 0 for question 3. The score per individual is ranging from 0 to 6 and corresponds to the sum of each modality.

cThe Fear of COVID-19 Score is based on the 7-item Fear of COVID-19 Scale (FCV-19S) with 5-point Likert scale from "Strongly disagree" (1) to "Strongly agree" (5). The score is ranging from 7 to 35 and corresponds to the sum of each modality.

dThe Clinical Outcomes in Routine Evaluation 6-dimension (CORE-6D) is a health-related quality of life questionnaire specific to mental health based on five emotional components and one physical health components.

eThe Short Form 6-Dimension version 2 (SF-6Dv2) is a 6-dimension generic health-related quality of life questionnaire.

fThe EuroQol 5-Dimension 5-Level (EQ-5D-5L) is a 5-dimension generic health-related quality of life questionnaire.

**Table S3**  **Univariate analysis of factors associated with vaccine confidence in the province of Quebec, Canada, 2020**

| **Variable** | **Vaccine confidence** | | | | |
| --- | --- | --- | --- | --- | --- |
| 0-1 | 2-3 | 4-5 | Total | -valuea |
| **N** | 139 | 199 | 1253 | 1,591 |  |
|  | 8.74% | 12.51% | 78.76% | 100.00% |  |
| **Gender** |  |  |  |  |  |
| Male | 35.97% | 43.72% | 50.68% | 48.52% | 0.003 |
| Female | 64.03% | 56.28% | 49.24% | 51.41% |  |
| Intersex | 0.00% | 0.00% | 0.08% | 0.06% |  |
| **Age** |  |  |  |  |  |
| N | 139 | 199 | 1253 | 1,591 |  |
| Mean | 44.39 | 46.94 | 51.33 | 50.17 | <.001 |
| Standard deviation | 14.99 | 16.33 | 16.02 | 16.13 | 0.526 |
| Range | (18-80) | (18-80) | (18-92) | (18-92) |  |
| **Age (in years)** |  |  |  |  |  |
| 18-39 | 43.88% | 38.69% | 28.17% | 30.86% | <.001 |
| 40-59 | 36.69% | 34.17% | 32.80% | 33.31% |  |
| 60 | 19.42% | 27.14% | 39.03% | 35.83% |  |
| **Education** |  |  |  |  |  |
| Secondary or less and Diploma of professional studies | 53.96% | 36.68% | 33.44% | 35.64% | <.001 |
| College and CEGEP | 28.06% | 31.66% | 28.33% | 28.72% |  |
| Baccalaureate, Master and PhD | 17.99% | 31.66% | 38.23% | 35.64% |  |
| **Income (CAD)** |  |  |  |  |  |
| N | 139 | 199 | 1,253 | 1,591 |  |
| Mean | 50,953 | 61,432 | 69,437 | 66,821 | <.001 |
| Standard deviation | 37,478 | 36,898 | 42,234 | 41,558 | 0.015 |
| Range | (2,500-165,000) | (2,500-165,000) | (2,500-165,000) | (2,500-165,000) |  |
| <$50,000 | 62.6% | 50.3% | 44.2% | 46.6% | <.001 |
| $50,000-$89,999 | 20.1% | 25.6% | 24.1% | 23.9% |  |
| ≥$90,000 | 17.3% | 24.1% | 31.7% | 29.5% |  |
| **Marital status** |  |  |  |  |  |
| Single | 43.88% | 34.17% | 26.34% | 28.85% | 0.001 |
| Married/living with a partner | 49.64% | 52.26% | 61.13% | 59.02% |  |
| Divorced/separated | 4.32% | 10.55% | 9.58% | 9.24% |  |
| Widowed | 2.16% | 3.02% | 2.95% | 2.89% |  |
| **Occupation** |  |  |  |  |  |
| Employed | 56.83% | 56.28% | 49.88% | 51.29% | <.001 |
| Retired | 16.55% | 26.13% | 34.80% | 32.12% |  |
| At home | 10.07% | 5.03% | 4.31% | 4.90% |  |
| Student | 2.88% | 5.03% | 3.83% | 3.90% |  |
| Unemployed | 10.07% | 4.52% | 4.23% | 4.78% |  |
| Sick and parental leave | 3.60% | 3.02% | 2.95% | 3.02% |  |
| **Type of residence** |  |  |  |  |  |
| Rural | 38.13% | 31.66% | 29.37% | 30.42% | 0.095 |
| Urban | 61.87% | 68.34% | 70.63% | 69.58% |  |
| **Housing status** |  |  |  |  |  |
| Owner | 53.96% | 53.77% | 65.04% | 62.66% | 0.001 |
| Tenant | 46.04% | 46.23% | 34.96% | 37.34% |  |
| **Greater Montreal area** |  |  |  |  |  |
| Outside of Greater Montreal | 57.55% | 50.25% | 56.26% | 55.63% | 0.253 |
| Greater Montreal | 42.45% | 49.75% | 43.74% | 44.37% |  |
| **Country of parents** |  |  |  |  |  |
| Canada | 86.33% | 77.89% | 88.51% | 86.99% | <.001 |
| France | 4.32% | 2.51% | 3.19% | 3.21% |  |
| Algeria | 1.44% | 1.01% | 0.48% | 0.63% |  |
| Other | 7.91% | 18.59% | 7.82% | 9.18% |  |
| **Country born** |  |  |  |  |  |
| Canada | 89.93% | 85.93% | 91.22% | 90.45% | 0.063 |
| France | 4.32% | 3.02% | 2.71% | 2.89% |  |
| Algeria | 1.44% | 0.50% | 0.48% | 0.57% |  |
| Other | 4.32% | 10.55% | 5.59% | 6.10% |  |
| **Residence status** |  |  |  |  |  |
| Temporary residence | 2.16% | 3.02% | 0.88% | 1.26% | 0.021 |
| Permanent residence | 0.00% | 2.51% | 2.23% | 2.07% |  |
| Canadian citizen | 97.84% | 94.47% | 96.89% | 96.67% |  |
| Yes | 51.08% | 55.78% | 48.12% | 49.34% | 0.122 |
| No | 48.92% | 44.22% | 51.88% | 50.66% |  |
| **Health care worker** |  |  |  |  |  |
| Yes | 9.86% | 21.62% | 15.26% | 15.67% | 0.088 |
| No | 90.14% | 78.38% | 84.74% | 84.33% |  |
| **Other essential worker** |  |  |  |  |  |
| Yes | 50.70% | 44.14% | 48.76% | 48.28% | 0.612 |
| No | 49.30% | 55.86% | 51.24% | 51.72% |  |
| **Non-essential worker** |  |  |  |  |  |
| Yes | 39.44% | 34.23% | 35.99% | 36.05% | 0.774 |
| No | 60.56% | 65.77% | 64.01% | 63.95% |  |
| **Caretaker** |  |  |  |  |  |
| Current | 6.47% | 11.06% | 6.46% | 7.04% | 0.091 |
| Former | 11.51% | 7.54% | 11.81% | 11.25% |  |
| Never | 82.01% | 81.41% | 81.72% | 81.71% |  |
| Yes | 22.30% | 25.13% | 20.59% | 21.31% | 0.334 |
| No | 77.70% | 74.87% | 79.41% | 78.69% |  |
| **Smoking** |  |  |  |  |  |
| Yes | 25.90% | 26.13% | 16.84% | 18.79% | 0.001 |
| No | 74.10% | 73.87% | 83.16% | 81.21% |  |
| **Ever faced Acute disease (yourself)** |  |  |  |  |  |
| Yes | 20.14% | 23.62% | 22.91% | 22.75% | 0.726 |
| No | 79.86% | 76.38% | 77.09% | 77.25% |  |
| **Ever faced acute disease (relative)** |  |  |  |  |  |
| Yes | 11.51% | 15.08% | 14.84% | 14.58% | 0.560 |
| No | 88.49% | 84.92% | 85.16% | 85.42% |  |
| **Ever faced acute disease (family)** |  |  |  |  |  |
| Yes | 42.45% | 46.73% | 46.93% | 46.51% | 0.602 |
| No | 57.55% | 53.27% | 53.07% | 53.49% |  |
| **COVID-19 yourself** |  |  |  |  |  |
| Yes | 1.44% | 2.51% | 1.76% | 1.82% | 0.660 |
| No | 98.56% | 97.49% | 98.24% | 98.18% |  |
| **COVID-19 family** |  |  |  |  |  |
| Yes | 3.60% | 5.53% | 3.91% | 4.09% | 0.538 |
| No | 96.40% | 94.47% | 96.09% | 95.91% |  |
| **COVID-19 relative** |  |  |  |  |  |
| Yes | 10.07% | 12.06% | 10.61% | 10.75% | 0.800 |
| No | 89.93% | 87.94% | 89.39% | 89.25% |  |
| **Financial loss** |  |  |  |  |  |
| No loss | 43.88% | 44.72% | 51.08% | 49.65% | 0.024 |
| Slightly important loss | 37.41% | 35.68% | 34.96% | 35.26% |  |
| Fairly important loss | 12.95% | 15.58% | 12.21% | 12.70% |  |
| Very important loss | 5.76% | 4.02% | 1.76% | 2.39% |  |
| **Sense of Coherence-3**b |  |  |  |  |  |
| N | 139 | 199 | 1,253 | 1,591 |  |
| Mean | 3.57 | 3.69 | 4.02 | 3.94 | <.001 |
| Standard deviation | 1.33 | 1.37 | 1.30 | 1.32 | 0.630 |
| Range | (0-6) | (0-6) | (0-6) | (0-6) |  |
| 0-4 | 77.70% | 69.85% | 62.57% | 64.80% | 0.001 |
| 5-6 | 22.30% | 30.15% | 37.43% | 35.20% |  |
| **Risk** |  |  |  |  |  |
| N | 136 | 195 | 1,231 | 1,562 |  |
| Mean | 4.77 | 5.08 | 4.63 | 4.70 | 0.051 |
| Standard deviation | 2.55 | 2.35 | 2.44 | 2.44 | 0.597 |
| Range | (0-10) | (0-10) | (0-10) | (0-10) |  |
| 0 | 5.88% | 3.08% | 4.39% | 4.35% | 0.101 |
| 1-5 | 53.68% | 51.79% | 59.30% | 57.87% |  |
| 6-9 | 36.76% | 42.56% | 34.77% | 35.92% |  |
| 10 | 3.68% | 2.56% | 1.54% | 1.86% |  |
| **Fear of COVID-19 Scale**c |  |  |  |  |  |
| N | 139 | 199 | 1,253 | 1,591 |  |
| Mean | 12.99 | 16.50 | 16.84 | 16.46 | <.001 |
| Standard deviation | 6.01 | 6.24 | 6.14 | 6.23 | 0.896 |
| Range | (7-33) | (7-35) | (7-35) | (7-35) |  |
| **CORE-6D**d |  |  |  |  |  |
| N | 139 | 199 | 1,249 | 1,587 |  |
| Mean | 0.756 | 0.716 | 0.760 | 0.754 | 0.001 |
| Standard deviation | 0.162 | 0.166 | 0.145 | 0.150 | 0.016 |
| Range | (0.160-0.950) | (0.100-0.950) | (0.100-0.950) | (0.100-0.950) |  |
| **SF-6Dv2**e |  |  |  |  |  |
| N | 139 | 199 | 1,253 | 1,591 |  |
| Mean | 0.711 | 0.66 | 0.737 | 0.725 | <.001 |
| Standard deviation | 0.279 | 0.295 | 0.248 | 0.259 | 0.001 |
| Range | (-0.439-1) | (-0.422-1) | (-0.452-1) | (-0.452-1) |  |
| **EQ-5D-5L**f | 139 | 199 | 1,251 | 1,589 |  |
| N | 0.839 | 0.824 | 0.848 | 0.845 | 0.058 |
| Mean | 0.146 | 0.158 | 0.133 | 0.138 | 0.002 |
| Standard deviation | (0.138-0.949) | (0.126-0.949) | (0.000-0.949) | (0.000-0.949) |  |
| Range |  |  |  |  |  |

aThe -values refer to tests between classes using one-way analysis of variance, Bartlett’s test for equality of variances, Fisher's exact test, and Chi-square of independence.

b3-item Sense-of-Coherence questionnaire with 3-point Likert scale "No", "Yes, sometimes" and "Yes, usually" encoded 0, 1 and 2 for questions 1 and 2 and encoded 2, 1 and 0 for question 3. The score per individual is ranging from 0 to 6 and corresponds to the sum of each modality.

cThe Fear of COVID-19 Score is based on the 7-item Fear of COVID-19 Scale (FCV-19S) with 5-point Likert scale from "Strongly disagree" (1) to "Strongly agree" (5). The score is ranging from 7 to 35 and corresponds to the sum of each modality.

dThe Clinical Outcomes in Routine Evaluation 6-dimension (CORE-6D) is a health-related quality of life questionnaire specific to mental health based on five emotional components and one physical health components.

eThe Short Form 6-Dimension version 2 (SF-6Dv2) is a 6-dimension generic health-related quality of life questionnaire.

fThe EuroQol 5-Dimension 5-Level (EQ-5D-5L) is a 5-dimension generic health-related quality of life questionnaire.

**Table S4** **Univariate analysis of factors associated with vaccine hesitancy in the province of Quebec, Canada, 2020**

| **Variable** | **Vaccine hesitancy** | | | | |
| --- | --- | --- | --- | --- | --- |
| 0-10 | 11-21 | 22-32 | Total | -valuea |
| **N** | 737 | 730 | 122 | 1,589 |  |
|  | 46.38% | 45.94% | 7.68% | 100.00% |  |
| **Gender** |  |  |  |  |  |
| Male | 52.65% | 45.89% | 39.34% | 48.52% | 0.005 |
| Female | 47.22% | 54.11% | 60.66% | 51.42% |  |
| Intersex | 0.14% | 0.00% | 0.00% | 0.06% |  |
| **Age** |  |  |  |  |  |
| N | 737 | 730 | 122 | 1,589 |  |
| Mean | 53.18 | 47.93 | 45.5 | 50.18 | <0.001 |
| Standard deviation | 15.83 | 15.82 | 16.42 | 16.11 | 0.854 |
| Range | (18-92) | (18-84) | (18-80) | (18-92) |  |
| **Age (in years)** |  |  |  |  |  |
| 18-39 | 24.29% | 35.89% | 40.16% | 30.84% | <0.001 |
| 40-59 | 32.84% | 33.56% | 35.25% | 33.35% |  |
| 60 | 42.88% | 30.55% | 24.59% | 35.81% |  |
| **Education** |  |  |  |  |  |
| Secondary or less and Diploma of professional studies | 27.95% | 41.51% | 47.54% | 35.68% | <0.001 |
| College and CEGEP | 28.63% | 28.63% | 29.51% | 28.70% |  |
| Baccalaureate, Master and PhD | 43.42% | 29.86% | 22.95% | 35.62% |  |
| **Income (CAD)** |  |  |  |  |  |
| N | 737 | 730 | 122 | 1,589 |  |
| Mean | 73,243 | 62,428 | 54,672 | 66,849 | <0.001 |
| Standard deviation | 43,146 | 39,253 | 39,535 | 41,576 | 0.031 |
| Range | (2,500-165,000) | (2,500-165,000) | (2,500-165,000) | (2,500-165,000) |  |
| <$50,000 | 40.8% | 49.7% | 61.5% | 46.5% | <0.001 |
| $50,000-$89,999 | 24.8% | 24.0% | 18.9% | 24.0% |  |
| ≥$90,000 | 34.3% | 26.3% | 19.7% | 29.5% |  |
| **Marital status** |  |  |  |  |  |
| Single | 24.42% | 32.19% | 35.25% | 28.82% | 0.022 |
| Married/living with a partner | 62.14% | 56.44% | 56.56% | 59.09% |  |
| Divorced/separated | 10.04% | 8.77% | 6.56% | 9.19% |  |
| Widowed | 3.39% | 2.60% | 1.64% | 2.89% |  |
| **Occupation** |  |  |  |  |  |
| Employed | 47.76% | 53.70% | 59.02% | 51.35% | <0.001 |
| Retired | 38.53% | 26.99% | 23.77% | 32.10% |  |
| At home | 3.39% | 6.16% | 6.56% | 4.91% |  |
| Student | 3.53% | 4.25% | 3.28% | 3.84% |  |
| Unemployed | 3.80% | 5.48% | 6.56% | 4.78% |  |
| Sick and parental leave | 2.99% | 3.42% | 0.82% | 3.02% |  |
| **Type of residence** |  |  |  |  |  |
| Rural | 25.78% | 34.52% | 34.43% | 30.46% | 0.001 |
| Urban | 74.22% | 65.48% | 65.57% | 69.54% |  |
| **Housing status** |  |  |  |  |  |
| Owner | 69.34% | 57.53% | 53.28% | 62.68% | <0.001 |
| Tenant | 30.66% | 42.47% | 46.72% | 37.32% |  |
| **Greater Montreal area** |  |  |  |  |  |
| Outside of Greater Montreal | 56.58% | 54.11% | 59.02% | 55.63% | 0.468 |
| Greater Montreal | 43.42% | 45.89% | 40.98% | 44.37% |  |
| **Country of parents** |  |  |  |  |  |
| Canada | 89.42% | 85.07% | 84.43% | 87.04% | 0.066 |
| France | 3.26% | 3.01% | 3.28% | 3.15% |  |
| Algeria | 0.27% | 0.96% | 0.82% | 0.63% |  |
| Other | 7.06% | 10.96% | 11.48% | 9.19% |  |
| **Country born** |  |  |  |  |  |
| Canada | 91.86% | 88.90% | 91.80% | 90.50% | 0.449 |
| France | 2.58% | 3.15% | 2.46% | 2.83% |  |
| Algeria | 0.27% | 0.82% | 0.82% | 0.57% |  |
| Other | 5.29% | 7.12% | 4.92% | 6.10% |  |
| **Residence status** |  |  |  |  |  |
| Temporary residence | 0.54% | 2.19% | 0.00% | 1.26% | 0.017 |
| Permanent residence | 1.49% | 2.60% | 2.46% | 2.08% |  |
| Canadian citizen | 97.96% | 95.21% | 97.54% | 96.66% |  |
| **Health care worker** |  |  |  |  |  |
| Yes | 16.47% | 16.44% | 7.35% | 15.67% | 0.143 |
| No | 83.53% | 83.56% | 92.65% | 84.33% |  |
| **Other essential worker** |  |  |  |  |  |
| Yes | 41.91% | 51.21% | 64.71% | 48.28% | 0.001 |
| No | 58.09% | 48.79% | 35.29% | 51.72% |  |
| **Non-essential worker** |  |  |  |  |  |
| Yes | 41.62% | 32.35% | 27.94% | 36.05% | 0.012 |
| No | 58.38% | 67.65% | 72.06% | 63.95% |  |
| **Caretaker** |  |  |  |  |  |
| Current | 5.83% | 7.53% | 10.66% | 6.99% | 0.183 |
| Former | 11.26% | 11.92% | 7.38% | 11.26% |  |
| Never | 82.90% | 80.55% | 81.97% | 81.75% |  |
| **Smoking** |  |  |  |  |  |
| Yes | 14.52% | 21.23% | 30.33% | 18.82% | <0.001 |
| No | 85.48% | 78.77% | 69.67% | 81.18% |  |
| **Ever faced Acute disease (yourself)** |  |  |  |  |  |
| Yes | 26.19% | 19.04% | 24.59% | 22.78% | 0.004 |
| No | 73.81% | 80.96% | 75.41% | 77.22% |  |
| **Ever faced acute disease (relative)** |  |  |  |  |  |
| Yes | 15.06% | 14.52% | 11.48% | 14.54% | 0.582 |
| No | 84.94% | 85.48% | 88.52% | 85.46% |  |
| **Ever faced acute disease (family)** |  |  |  |  |  |
| Yes | 50.47% | 42.60% | 45.90% | 46.51% | 0.010 |
| No | 49.53% | 57.40% | 54.10% | 53.49% |  |
| **COVID-19 yourself** |  |  |  |  |  |
| Yes | 1.22% | 2.33% | 2.46% | 1.83% | 0.193 |
| No | 98.78% | 97.67% | 97.54% | 98.17% |  |
| **COVID-19 family** |  |  |  |  |  |
| Yes | 4.34% | 3.97% | 3.28% | 4.09% | 0.905 |
| No | 95.66% | 96.03% | 96.72% | 95.91% |  |
| **COVID-19 relative** |  |  |  |  |  |
| Yes | 10.31% | 11.23% | 10.66% | 10.76% | 0.850 |
| No | 89.69% | 88.77% | 89.34% | 89.24% |  |
| **Financial loss** |  |  |  |  |  |
| No loss | 53.32% | 46.44% | 45.90% | 49.59% | 0.002 |
| Slightly important loss | 34.33% | 36.58% | 33.61% | 35.31% |  |
| Fairly important loss | 11.26% | 13.97% | 13.93% | 12.71% |  |
| Very important loss | 1.09% | 3.01% | 6.56% | 2.39% |  |
| **Sense of Coherence-3**b |  |  |  |  |  |
| N | 737 | 730 | 122 | 1,589 |  |
| Mean | 4.20 | 3.73 | 3.57 | 3.94 | <0.001 |
| Standard deviation | 1.31 | 1.29 | 1.28 | 1.32 | 0.901 |
| Range | (0-6) | (0-6) | (0-6) | (0-6) |  |
| 0-4 | 55.90% | 71.64% | 77.87% | 64.82% | <0.001 |
| 5-6 | 44.10% | 28.36% | 22.13% | 35.18% |  |
| **Risk** |  |  |  |  |  |
| N | 723 | 718 | 119 | 1560 |  |
| Mean | 4.49 | 4.86 | 4.98 | 4.70 | 0.007 |
| Standard deviation | 2.44 | 2.39 | 2.64 | 2.44 | 0.353 |
| Range | (0-10) | (0-10) | (0-10) | (0-10) |  |
| 0 | 4.70% | 3.62% | 6.72% | 4.36% | 0.016 |
| 1-5 | 61.69% | 55.57% | 48.74% | 57.88% |  |
| 6-9 | 32.37% | 38.44% | 42.02% | 35.90% |  |
| 10 | 1.24% | 2.37% | 2.52% | 1.86% |  |
| **Fear of COVID-19 Scale**c |  |  |  |  |  |
| N | 737 | 730 | 122 | 1589 |  |
| Mean | 16.14 | 17.23 | 13.77 | 16.46 | <0.001 |
| Standard deviation | 5.76 | 6.62 | 5.69 | 6.23 | 0.000 |
| Range | (7-35) | (7-35) | (7-34) | (7-35) |  |
| **CORE-6D**d |  |  |  |  |  |
| N | 736 | 730 | 121 | 1587 |  |
| Mean | 0.779 | 0.731 | 0.748 | 0.754 | <0.001 |
| Standard deviation | 0.126 | 0.169 | 0.142 | 0.15 | 0.000 |
| Range | (0.100-0.950) | (0.100-0.950) | (0.350-0.950) | (0.100-0.950) |  |
| **SF-6Dv2**e |  |  |  |  |  |
| N | 737 | 730 | 122 | 1589 |  |
| Mean | 0.757 | 0.698 | 0.700 | 0.725 | <0.001 |
| Standard deviation | 0.242 | 0.270 | 0.266 | 0.259 | 0.008 |
| Range | (-0.452-1) | (-0.445-1) | (-0.160-1) | (-0.452-1) |  |
| **EQ-5D-5L**f |  |  |  |  |  |
| N | 737 | 730 | 122 | 1589 |  |
| Mean | 0.853 | 0.837 | 0.837 | 0.845 | 0.062 |
| Standard deviation | 0.128 | 0.147 | 0.134 | 0.138 | 0.001 |
| Range | (0.103-0.949) | (0.000-0.949) | (0.288-0.949) | (0.000-0.949) |  |

aThe -values refer to tests between classes using one-way analysis of variance, Bartlett’s test for equality of variances, Fisher's exact test, and Chi-square test of independence.

b3-item Sense-of-Coherence questionnaire with 3-point Likert scale "No", "Yes, sometimes" and "Yes, usually" encoded 0, 1 and 2 for questions 1 and 2 and encoded 2, 1 and 0 for question 3. The score per individual is ranging from 0 to 6 and corresponds to the sum of each modality.

cThe Fear of COVID-19 Score is based on the 7-item Fear of COVID-19 Scale (FCV-19S) with 5-point Likert scale from "Strongly disagree" (1) to "Strongly agree" (5). The score is ranging from 7 to 35 and corresponds to the sum of each modality.

dThe Clinical Outcomes in Routine Evaluation 6-dimension (CORE-6D) is a health-related quality of life questionnaire specific to mental health based on five emotional components and one physical health components.

eThe Short Form 6-Dimension version 2 (SF-6Dv2) is a 6-dimension generic health-related quality of life questionnaire.

fThe EuroQol 5-Dimension 5-Level (EQ-5D-5L) is a 5-dimension generic health-related quality of life questionnaire.

**Table S5**  **Univariate analysis of factors associated with COVID-19 vaccination refusal in the province of Quebec, Canada, 2020.**

| **Variable** | **Vaccine refusal** | | | | | |
| --- | --- | --- | --- | --- | --- | --- |
| 0 | 1-6 | 7-11 | 12 | Total | -valuea |
| **N** | 603 | 705 | 172 | 119 | 1,599 |  |
|  | 37.71% | 44.09% | 10.76% | 7.44% | 100.00% |  |
| **Gender** |  |  |  |  |  |  |
| Male | 50.08% | 50.92% | 44.19% | 33.61% | 48.59% | 0.004 |
| Female | 49.92% | 48.94% | 55.81% | 66.39% | 51.34% |  |
| Intersex | 0.00% | 0.14% | 0.00% | 0.00% | 0.06% |  |
| **Age** |  |  |  |  |  |  |
| N | 603 | 705 | 172 | 119 | 1,599 |  |
| Mean | 51.19 | 50.37 | 50.25 | 44.61 | 50.23 | 0.001 |
| Standard deviation | 16.56 | 15.84 | 16.06 | 14.78 | 16.13 | 0.396 |
| Range | (18-92) | (18-82) | (18-81) | (18-80) | (18-92) |  |
| **Age (in years)** |  |  |  |  |  |  |
| 18-39 | 28.86% | 30.21% | 27.91% | 47.06% | 30.71% | <.001 |
| 40-59 | 31.51% | 33.05% | 40.70% | 34.45% | 33.40% |  |
| 60 | 39.64% | 36.74% | 31.40% | 18.49% | 35.90% |  |
| **Education** |  |  |  |  |  |  |
| Secondary or less and Diploma of professional studies | 33.50% | 33.62% | 43.60% | 45.38% | 35.52% | 0.002 |
| College and CEGEP | 28.36% | 28.37% | 30.23% | 31.93% | 28.83% |  |
| Baccalaureate, Master and PhD | 38.14% | 38.01% | 26.16% | 22.69% | 35.65% |  |
| **Income (CAD)** |  |  |  |  |  |  |
| N | 603 | 705 | 172 | 119 | 1,599 |  |
| Mean | 68,155 | 69,848 | 58,953 | 53,992 | 66,857 | <.001 |
| Standard deviation | 42,837 | 40,939 | 38,398 | 39,812 | 41,570 | 0.285 |
| Range | (2,500-165,000) | (2,500-165,000) | (2,500-165,000) | (2,500-165,000) | (2,500-165,000) |  |
| <$50,000 | 46.3% | 42.6% | 56.4% | 58.0% | 46.6% | 0.001 |
| $50,000-$89,999 | 23.2% | 24.5% | 22.7% | 25.2% | 23.9% |  |
| ≥$90,000 | 30.5% | 32.9% | 20.9% | 16.8% | 29.5% |  |
| **Marital status** |  |  |  |  |  |  |
| Single | 28.36% | 27.38% | 29.65% | 37.82% | 28.77% | 0.544 |
| Married/living with a partner | 59.37% | 60.43% | 57.56% | 52.10% | 59.10% |  |
| Divorced/separated | 9.95% | 8.65% | 9.88% | 8.40% | 9.26% |  |
| Widowed | 2.32% | 3.55% | 2.91% | 1.68% | 2.88% |  |
| **Occupation** |  |  |  |  |  |  |
| Employed | 49.92% | 52.77% | 46.51% | 53.78% | 51.09% | <.001 |
| Retired | 34.66% | 33.33% | 29.65% | 17.65% | 32.27% |  |
| At home | 4.31% | 3.97% | 6.98% | 10.92% | 4.94% |  |
| Student | 4.48% | 3.26% | 4.07% | 4.20% | 3.88% |  |
| Unemployed | 4.31% | 3.26% | 8.14% | 11.76% | 4.82% |  |
| Sick and parental leave | 2.32% | 3.40% | 4.65% | 1.68% | 3.00% |  |
| **Residence** |  |  |  |  |  |  |
| Rural | 31.18% | 28.37% | 28.49% | 40.34% | 30.33% | 0.060 |
| Urban | 68.82% | 71.63% | 71.51% | 59.66% | 69.67% |  |
| **Housing status** |  |  |  |  |  |  |
| Owner | 64.01% | 64.40% | 54.65% | 55.46% | 62.54% | 0.033 |
| Tenant | 35.99% | 35.60% | 45.35% | 44.54% | 37.46% |  |
| **Greater Montreal area** |  |  |  |  |  |  |
| Outside of Greater Montreal | 56.55% | 54.61% | 54.65% | 57.14% | 55.53% | 0.879 |
| Greater Montreal | 43.45% | 45.39% | 45.35% | 42.86% | 44.47% |  |
| **Country of parents** |  |  |  |  |  |  |
| Canada | 88.39% | 86.38% | 85.47% | 84.03% | 86.87% | 0.162 |
| France | 2.16% | 3.40% | 5.23% | 5.04% | 3.25% |  |
| Algeria | 0.66% | 0.28% | 1.74% | 0.84% | 0.63% |  |
| Other | 8.79% | 9.93% | 7.56% | 10.08% | 9.26% |  |
| **Country born** |  |  |  |  |  |  |
| Canada | 90.38% | 91.06% | 88.95% | 88.24% | 90.37% | 0.267 |
| France | 2.65% | 2.41% | 4.65% | 5.04% | 2.94% |  |
| Algeria | 0.50% | 0.28% | 1.74% | 0.84% | 0.56% |  |
| Other | 6.47% | 6.24% | 4.65% | 5.88% | 6.13% |  |
| **Residence status** |  |  |  |  |  |  |
| Temporary residence | 1.33% | 1.28% | 1.16% | 0.84% | 1.25% | 0.999 |
| Permanent residence | 1.99% | 2.13% | 2.33% | 1.68% | 2.06% |  |
| Canadian citizen | 96.68% | 96.60% | 96.51% | 97.48% | 96.69% |  |
| Temporary residence permit/Permanent residence | 3.32% | 3.40% | 3.49% | 2.52% | 3.31% | 0.987 |
| Canadian citizen | 96.68% | 96.60% | 96.51% | 97.48% | 96.69% |  |
| **Continue working during COVID-19 crisis** | |  |  |  |  |  |
| Yes | 49.59% | 48.94% | 48.84% | 48.74% | 49.16% | 0.995 |
| No | 50.41% | 51.06% | 51.16% | 51.26% | 50.84% |  |
| **Health care worker** |  |  |  |  |  |  |
| Yes | 20.40% | 12.75% | 13.10% | 12.07% | 15.65% | 0.040 |
| No | 79.60% | 87.25% | 86.90% | 87.93% | 84.35% |  |
| **Other essential worker** |  |  |  |  |  |  |
| Yes | 42.81% | 51.88% | 50.00% | 53.45% | 48.35% | 0.107 |
| No | 57.19% | 48.12% | 50.00% | 46.55% | 51.65% |  |
| **Non-essential worker** |  |  |  |  |  |  |
| Yes | 36.79% | 35.36% | 36.90% | 34.48% | 36.01% | 0.973 |
| No | 63.21% | 64.64% | 63.10% | 65.52% | 63.99% |  |
| **Caretaker** |  |  |  |  |  |  |
| Current | 8.13% | 6.24% | 8.72% | 5.88% | 7.19% | 0.695 |
| Former | 10.95% | 11.91% | 8.72% | 11.76% | 11.19% |  |
| Never | 80.93% | 81.84% | 82.56% | 82.35% | 81.61% |  |
| **Smoking** |  |  |  |  |  |  |
| Yes | 17.58% | 18.72% | 23.26% | 20.17% | 18.89% | 0.398 |
| No | 82.42% | 81.28% | 76.74% | 79.83% | 81.11% |  |
| **Ever faced Acute disease (yourself)** |  |  |  |  |  |  |
| Yes | 22.06% | 23.97% | 23.26% | 18.49% | 22.76% | 0.569 |
| No | 77.94% | 76.03% | 76.74% | 81.51% | 77.24% |  |
| **Ever faced acute disease (relative)** |  |  |  |  |  |  |
| Yes | 13.10% | 16.45% | 14.53% | 11.76% | 14.63% | 0.285 |
| No | 86.90% | 83.55% | 85.47% | 88.24% | 85.37% |  |
| **Ever faced acute disease (family)** |  |  |  |  |  |  |
| Yes | 46.77% | 48.37% | 43.60% | 40.34% | 46.65% | 0.336 |
| No | 53.23% | 51.63% | 56.40% | 59.66% | 53.35% |  |
| **COVID-19 yourself** |  |  |  |  |  |  |
| Yes | 1.82% | 1.84% | 1.74% | 1.68% | 1.81% | 0.999 |
| No | 98.18% | 98.16% | 98.26% | 98.32% | 98.19% |  |
| **COVID-19 family** |  |  |  |  |  |  |
| Yes | 4.48% | 4.11% | 4.07% | 1.68% | 4.07% | 0.599 |
| No | 95.52% | 95.89% | 95.93% | 98.32% | 95.93% |  |
| **COVID-19 relative** |  |  |  |  |  |  |
| Yes | 12.44% | 9.79% | 8.14% | 11.76% | 10.76% | 0.282 |
| No | 87.56% | 90.21% | 91.86% | 88.24% | 89.24% |  |
| **Financial loss** |  |  |  |  |  |  |
| No loss | 50.58% | 48.51% | 51.74% | 47.90% | 49.59% | 0.819 |
| Slightly important loss | 34.16% | 36.60% | 34.88% | 34.45% | 35.33% |  |
| Fairly important loss | 13.27% | 12.48% | 11.63% | 12.61% | 12.70% |  |
| Very important loss | 1.99% | 2.41% | 1.74% | 5.04% | 2.38% |  |
| **Perceived reduction in their quality of life due to physical or mental problem** | | | | | | |
| Yes | 26.70% | 27.80% | 34.30% | 25.21% | 27.89% | 0.224 |
| No | 73.30% | 72.20% | 65.70% | 74.79% | 72.11% |  |
| **Sense of Coherence-3**b |  |  |  |  |  |  |
| N | 603 | 705 | 172 | 119 | 1,599 |  |
| Mean | 3.98 | 3.96 | 3.90 | 3.67 | 3.94 | 0.123 |
| Standard deviation | 1.33 | 1.31 | 1.31 | 1.38 | 1.32 | 0.889 |
| Range | (0-6) | (0-6) | (1-6) | (0-6) | (0-6) |  |
| 0-4 | 63.85% | 63.69% | 67.44% | 72.27% | 64.79% | 0.255 |
| 5-6 | 36.15% | 36.31% | 32.56% | 27.73% | 35.21% |  |
| **Risk** |  |  |  |  |  |  |
| N | 593 | 691 | 169 | 117 | 1,570 |  |
| Mean | 5.02 | 4.51 | 4.37 | 4.58 | 4.69 | 0.001 |
| Standard deviation | 2.36 | 2.43 | 2.43 | 2.70 | 2.44 | 0.289 |
| Range | (0-10) | (0-10) | (0-10) | (0-10) | (0-10) |  |
| 0 | 2.70% | 4.78% | 6.51% | 7.69% | 4.39% | 0.007 |
| 1-5 | 55.14% | 59.77% | 62.13% | 56.41% | 58.03% |  |
| 6-9 | 40.47% | 34.01% | 28.40% | 32.48% | 35.73% |  |
| 10 | 1.69% | 1.45% | 2.96% | 3.42% | 1.85% |  |
| **Fear of COVID-19 Scale**c |  |  |  |  |  |  |
| N | 603 | 705 | 172 | 119 | 1,599 |  |
| Mean | 16.86 | 16.58 | 16.90 | 12.95 | 16.45 | <.001 |
| Standard deviation | 6.53 | 5.84 | 6.20 | 5.82 | 6.22 | 0.031 |
| Range | (7-35) | (7-35) | (7-35) | (7-31) | (7-35) |  |
| **CORE-6D**d |  |  |  |  |  |  |
| N | 599 | 700 | 170 | 118 | 1,587 |  |
| Mean | 0.752 | 0.756 | 0.748 | 0.761 | 0.754 | 0.858 |
| Standard deviation | 0.155 | 0.146 | 0.151 | 0.150 | 0.150 | 0.526 |
| Range | (0.100-0.950) | (0.100-0.950) | (0.100-0.950) | (0.160-0.950) | (0.100-0.950) |  |
| **SF-6Dv2**e |  |  |  |  |  |  |
| N | 603 | 705 | 172 | 119 | 1,599 |  |
| Mean | 0.733 | 0.722 | 0.722 | 0.717 | 0.726 | 0.856 |
| Standard deviation | 0.252 | 0.262 | 0.25 | 0.28 | 0.258 | 0.391 |
| Range | (-0.445-1) | (-0.452-1) | (-0.422-1) | (-0.439-1) | (-0.452-1) |  |
| **EQ-5D-5L**f |  |  |  |  |  |  |
| N | 600 | 701 | 170 | 118 | 1,589 |  |
| Mean | 0.845 | 0.842 | 0.847 | 0.85 | 0.845 | 0.926 |
| Standard deviation | 0.135 | 0.144 | 0.123 | 0.135 | 0.138 | 0.066 |
| Range | (0.000-0.949) | (0.045-0.949) | (0.172-0.949) | (0.138-0.949) | (0.000-0.949) |  |

aThe -values refer to tests between classes using one-way analysis of variance, Bartlett’s test for equality of variances, Fisher's exact test, and Chi2 test of independence.

b3-item Sense-of-Coherence questionnaire with 3-point Likert scale "No", "Yes, sometimes" and "Yes, usually" encoded 0, 1 and 2 for questions 1 and 2 and encoded 2, 1 and 0 for question 3. The score per individual is ranging from 0 to 6 and corresponds to the sum of each modality.

cThe Fear of COVID-19 Score is based on the 7-item Fear of COVID-19 Scale (FCV-19S) with 5-point Likert scale from "Strongly disagree" (1) to "Strongly agree" (5). The score is ranging from 7 to 35 and corresponds to the sum of each modality.

dThe Clinical Outcomes in Routine Evaluation 6-dimension (CORE-6D) is a health-related quality of life questionnaire specific to mental health based on five emotional components and one physical health components.

eThe Short Form 6-Dimension version 2 (SF-6Dv2) is a 6-dimension generic health-related quality of life questionnaire.

fThe EuroQol 5-Dimension 5-Level (EQ-5D-5L) is a 5-dimension generic health-related quality of life questionnaire.

**Table S6 Multivariable logistic regression analysis of factors associated with vaccine acceptance, confidence, and hesitancy in general, and COVID-19 vaccination refusal in the province of Quebec, Canada, 2020**

| **Variables** | **Vaccine acceptance** | | **Vaccine confidence** | | **Vaccine hesitancy** | | **Vaccine refusal** | |
| --- | --- | --- | --- | --- | --- | --- | --- | --- |
|  | AOR (95% CI) | P-value | AOR (95% CI) | P-value | AOR (95% CI) | P-value | AOR (95% CI) | P-value |
| **Age** |  |  |  |  |  |  |  |  |
| 18-39 | REF |  | REF |  | REF |  | REF |  |
| 40-59 | 1.40 (1.08-1.81) | 0.013 | 1.56 (0.76-2.50 | 0.065 | 1.28 (0.89-2.12) | 0.174 | 0.68 (0.52-0.87) | 0.011 |
| 60 | 1.84 (1.07-1.86) | 0.014 | 2.08 (1.24-3.49) | 0.006 | 1.72 (1.54-1.82) | 0.008 | 0.65 (0.47-0.91) | 0.005 |
| **Education** |  |  |  |  |  |  |  |  |
| Secondary or less and Diploma of professional studies | REF |  | REF |  | REF |  | REF |  |
| College and CEGEP | 1.45 (0.94 1.59) | 0.13 | 1.57 (1.12-2.00) | 0.009 | 0.68 (0.52-0.87) | 0.002 | 0.80 (0.47-1.02) | 0.070 |
| Baccalaureate, Master and PhD | 1.66 (1.29-2.14) | <0.001 | 1.96 (1.14-2.74) | <0.001 | 0.48 (0.37-0.61) | <0.001 | 0.74 (0.63-0.94) | 0.012 |
| **Income** |  |  |  |  |  |  |  |  |
| <$50,000 | REF |  | REF |  | REF |  | REF |  |
| $50,000-$89,999 | 1.23 (0.67- 0.38) | 0.59 | 1.53 (1.05-2.23) | 0.026 | 0.85 (0.64-1.14) | 0.280 | 0.84 (0.64-2.39) | 0.190 |
| ≥$90,000 | 4.36 (3.36-5.81) | 0.001 | 1.83 (1.25-2.69) | 0.002 | 0.68 (0.50-0.91) | 0.011 | 0.83 (0.65-1.02) | 0.170 |
| **Marital status** |  |  |  |  |  |  |  |  |
| Single | REF |  | REF |  | REF |  |  |  |
| Married/living with a partner | 0.98 (0.51-1.94) | 0.971 | 1.04 (0.45-2.24) | 0.449 | 1.02 (0.52-2.01) | 0.949 |  |  |
| Divorced/separated | 0.51 (0.51-1.76) | 0.861 | 0.84 (0.38-1.83) | 0.654 | 0.80 (0.43-1.49) | 0.479 |  |  |
| Widowed | 2.41 (0.58-2.07) | 0. 971 | 0.72 (0.30-1.70) | 0.992 | 0.84 (0.44-1.59) | 0.591 |  |  |
| **Occupation** |  |  |  |  |  |  |  |  |
| Employed |  |  | 1.21 (0.60-2.48) | 0.593 | 0.61 (0.89-1.13) | 0.118 | 1.02 (0.58-1.79) | 0.945 |
| Retired |  |  | 1.16 (0.52-2.63) | 0.722 | 0.60 (0.31-1.19) | 0.144 | 0.94 (0.51-1.74) | 0.846 |
| At home |  |  | 1.45 (0.63-3.37) | 0.384 | 0.52 (0.25-1.08) | 0.081 | 0.83 (0.42-1.65) | 0.602 |
| Student |  |  | 0.66 (0.26-1.67) | 0.384 | 1.01 (0.46-2.23) | 0.980 | 1.48 (0.71-3.07) | 0.291 |
| Unemployed |  |  | 1.09 (0.46-2.59) | 0.841 | 0.72 (0.34-1.53) | 0.394 | 0.65 (0.33-1.29) | 0.215 |
| Sick and parental leave |  |  | REF |  | REF |  | REF |  |
| **Housing status** |  |  |  |  |  |  |  |  |
| Owner |  |  | 0.89 (0.67-1.20) | 0.468 | 1.23 (0.97-1.56) | .081 | 1.04 (0.83-1.29) | 0.723 |
| Tenant |  |  | REF |  | REF |  | REF |  |
| **Country born** |  |  |  |  |  |  |  |  |
| Canada |  |  | 1.81 (1.39-2.88) | 0.012 |  |  |  |  |
| Others |  |  | REF |  |  |  |  |  |
| **Residence status** |  |  |  |  |  |  |  |  |
| Temporary residence permit |  |  | REF |  |  |  |  |  |
| Permanent residence |  |  | 0.50 (0.17-1.45) | 0.205 |  |  |  |  |
| Canadian citizen |  |  | 1.30 (0.47-3.61) | 0.620 |  |  |  |  |
| **Other essential worker** |  |  |  |  |  |  |  |  |
| Yes |  |  |  |  | 0.67 (0.52-0.87) | 0.003 |  |  |
| No |  |  |  |  | REF |  |  |  |
| **Caretaker** |  |  |  |  |  |  |  |  |
| Current |  |  |  |  | 1.52 (1.02-2.24) | 0 .038 |  |  |
| Former |  |  |  |  | 0.96 (0.70-1.33) | 0.825 |  |  |
| Never |  |  |  |  | REF |  |  |  |
| **Smoking** |  |  |  |  |  |  |  |  |
| Yes | 0.69 (0.54-0.90) | 0.006 | 0.25 (0.51-0.93) | 0.018 | 1.27 (0.61-1.65) | 0.075 |  |  |
| No | REF |  | REF |  | REF |  |  |  |
| **Financial loss** |  |  |  |  |  |  |  |  |
| No loss | REF |  | REF |  | REF |  |  |  |
| Slightly important loss | 0.44 (0.23-0.860 | 0.018 | 0.51 (0.24-1.08) | 0.077 | 2.55 (1.25-5.17) | 0.009 |  |  |
| Fairly important loss | 0.94 (0.27-0.96) | 0.040 | 0.48(0.23-0.97) | 0.042 | 2.62 (1.33-5.18) | 0.005 |  |  |
| Very important loss | 0.40 (0.21-0.28) | .004 | 0.38 (0.19-0.78) | 0.008 | 2.98 (1.52-5.88) | 0.002 |  |  |
| **Sense of Coherence-3** |  |  |  |  |  |  |  |  |
| 0-4 | REF | 0.019 | REF |  |  |  |  |  |
| 5-6 | 1.31 (1.05-1.64) |  | 1.43 (1.08-1.91) | 0.014 |  |  |  |  |
| **Risk** |  |  |  |  |  |  |  |  |
| 0 |  |  |  |  |  |  | REF |  |
| 1-5 |  |  |  |  |  |  | 1.69 (0.84-3.43 | 0.141 |
| 6-9 |  |  |  |  |  |  | 1.33 (0.66-2.66) | .426 |
| 10 |  |  |  |  |  |  | 0.75 (0.33-2.02) | .491 |
| **Fear of COVID-19 scale** | 1.05 (1.03-1.07) | <0.001 | 1.08 (1.06-1.11) | <0.001 | 0.96 (0.95-0.98) | <.001 |  |  |
| **CORE-6D** |  |  |  |  | 0.29 (0.12-0.69) | 0.005 |  |  |
| **SF-6Dv2** |  |  |  |  | 0.61 (0.33-1.31) | 0.120 |  |  |
| **EQ-5D-5L** |  |  |  |  | 0.31 (0.10-0.97) | 0.045 |  |  |

CI, confidence interval; REF, reference; CORE-6D, Clinical Outcomes in Routine Evaluation Six-Dimension; SF-6Dv2, Short-form Six-Dimension version 2; EQ-5D-5L, The EuroQol 5-Dimension 5-Level
